# Supplementary material
Source: Research Square preprint supplement (doi:10.21203/rs.3.rs-8581899/v1)
Supplement: Supplementary file 1 [file adab90416805506fc5b156dc.doc]

| **Age (years)** | Mean, SD |
| --- | --- |
| **Sex** | Male |
| **3. Do you currently work as a Vascular Surgeon?** | Yes |
| **4. This professional activity as a Vascular Surgeon is carried out in:** | Spain |
| Abroad |
| Spain and abroad |
| **5. In Spain, in which Autonomous Community?** | Catalonia |
| Madrid |
| Andalusia |
| Valencian Community |
| Galicia |
| Asturias |
| Castilla y León |
| Aragón |
| Canary Islands |
| Basque Country |
| Castilla-La Mancha |
| Balearic Islands |
| Murcia |
| Extremadura |
| Navarra |
| Cantabria |
| La Rioja |
| **6. Where did you complete your training as a Vascular Surgeon?** | Spain |
| Abroad |
| Spain and abroad |
| **7. The municipality/city where you currently work as a Vascular Surgeon has:** | 0–50,000 inhabitants |
| 50,000–100,000 |
| 100,000–500,000 |
| 500000 |
| NA |
| **8. Weekly working hours (excluding on-call shifts):** | Mean, SD |
| **9. Current position:** | Resident |
| Attending physician |
| **10. Do you work in a PUBLIC hospital (including publicly managed private)?** | Yes |
| **11. Approximate number of beds in your Public Hospital:** | <200 |
| 201–350 |
| 351–600 |
| 601–1,000 |
| 1000 |
| NA |
| **12. Weekly contracted hours in your Public Hospital (excluding on-calls):** | <35 h |
| 35–40 h |
| NA |
| **13. Type of Public Hospital:** | Referral (>1,000 beds) |
| Referral (<1,000 beds) |
| Tertiary (university, usually with residency programs) |
| Regional |
| NA |
| **14. Years working in Public Hospital as Vascular Surgeon:** | Mean, SD |
| **15. Availability of specialized resources in your Public Hospital (multiple answers):** | Vascular lab (ultrasound by nurses) |
| Vascular lab (ultrasound by vascular surgeons) |
| High-resolution outpatient clinics |
| Clinics with ultrasound equipment in some of them |
| NA |
| **16. Specialized staff in your Public Hospital (multiple answers):** | Podiatrist |
| Specialized nurses (own consultation) |
| None |
| **17. Residents covering on-call duties in your Public Hospital:** | Cover all shifts (even >6 per month) |
| Do not cover all shifts (>6 per month each) |
| Do not cover all shifts (6 per month each) |
| No residents |
| **18. In addition to on-call duties, do you have:** | Extended working hours (afternoon, not on-call) |
| Paid extra shifts (peonadas) |
| None |
| Other |
| **19. On-call shifts for attendings in your PUBLIC hospital are:** | Only first-call on-site |
| Only first-call on-call (not on-site) |
| First- and second-call on-call (not on-site) |
| First-call on-site, second-call on-call |
| No on-call shifts |
| NA |
| **20. Average monthly number of on-site weekday calls in your PUBLIC hospital:** | 0 |
| 1–3 |
| ≥4 |
| **21. Average monthly number of on-site weekend calls in your PUBLIC hospital:** | 0 |
| 1 |
| ≥2 |
| **22. Average monthly number of weekday on-call (off-site) shifts in your PUBLIC hospital:** | 0 |
| 1–6 |
| ≥7 |
| **23. Average monthly number of weekend on-call (off-site) shifts in your PUBLIC hospital:** | 0 |
| 1–2 |
| ≥3 |
| **24. At what age do you expect to retire from PUBLIC sector activity?** | <65 |
| 65–69 |
| ≥70 |
| NA |
| **25. Do you also work as a Vascular Surgeon in a private hospital/clinic?** | Yes |
| **26. Approximate number of beds in your PRIVATE hospital:** | No beds (private practice only) |
| <200 beds |
| 201–350 beds |
| 351–600 beds |
| 601–1,000 beds |
| NA |
| **27. Weekly working hours in PRIVATE hospital/practice (excluding on-call):** | Mean, SD |
| **28. Years working as Vascular Surgeon in PRIVATE hospital/practice:** | Mean, SD |
| **29. In your PRIVATE hospital/practice you have (multiple answers):** | Vascular lab (ultrasounds performed by nurses) |
| Vascular lab (ultrasounds performed by vascular surgeons) |
| High-resolution outpatient clinics |
| Clinics with ultrasound in some |
| NA |
| **30. In your PRIVATE hospital/practice you have:** | Podiatrist |
| Specialized nurses for wound care |
| Work in multiple centers, some with podiatrist/nurses, some without |
| None of the above |
| **31. On-call shifts in your PRIVATE hospital/practice:** | Only first-call on-site |
| Only first-call on-call |
| First- and second-call on-call |
| First-call on-site, second-call on-call |
| No on-calls |
| NA |
| **32. Average monthly number of on-site weekend calls in your PRIVATE hospital:** | 0 |
| **33. Average monthly number of on-site weekday calls in your PRIVATE hospital:** | 0 |
| **34. Average monthly number of weekend on-call (off-site) shifts in your PRIVATE hospital:** | 0 |
| 1–2 |
| ≥3 |
| **35. Average monthly number of weekday on-call (off-site) shifts in your PRIVATE hospital:** | 0 |
| 1–6 |
| ≥7 |
| **36. At what age do you expect to retire from PRIVATE sector activity?** | <65 |
| 65–69 |
| ≥70 |
| **37. In 2021, did you take parental leave, research leave, or similar?** | Yes |
| **38. Duration of such leave (months):** | 1–5 |
| 6–12 |
| **39. In 2021, did you have a daily work-hour reduction?** | Yes |
| **40. Duration of daily reduction:** | Up to 2.5 hours |
| 3–5 hours |
| Other |
| **41. Annual number of days with daily reduction:** | <30 |
| 30–59 |
| ≥60 |
| **42. Distribution of total weekly working time (%):** | Clinical care |
| Teaching |
| Management |
| Research |
| **43. Do you perform scientific activity outside working hours?** | Yes |
| **44. Average weekly hours of extra scientific activity (excluding congresses):** | ≤3 hours |
| ≥4 hours |
| **45. Do you provide clinical care?** | Yes |
| **46. Of your total clinical care time (%):** | Outpatient clinic/vascular lab |
| Ward rounds |
| OR/hybrid room |
| **47. Distribution of outpatient visits (%):** | First visits |
| Follow-ups |
| Diagnostic tests (ABI, Doppler, others) |
| **48. Average duration of FIRST visits:** | 10 min |
| 20 min |
| 30 min |
| 40 min |
| 50 min |
| **49. Optimal duration of FIRST visits (perceived):** | 10 min |
| 20 min |
| 30 min |
| 40 min |
| 50 min |
| **49b. Optimal duration of FOLLOW-UP visits (perceived):** | 10 min |
| 20 min |
| 30 min |
| 40 min |
| 50 min |
| **50. Specialist accompanying ward rounds (multiple answers):** | Internal Medicine |
| Infectious Diseases |
| Geriatrics |
| Endocrinology |
| None |
| **51. Do public hospitals in your province face difficulties recruiting Vascular Surgeons? (multiple answers):** | Reference hospitals (>1,000 beds) – No |
| Reference hospitals (>1,000 beds) – Yes |
| Tertiary hospitals – No |
| Tertiary hospitals – Yes |
| Regional hospitals – No |
| Regional hospitals – Yes |
| NA |
| **52. Are there specific problems recruiting Vascular Surgeons in PRIVATE hospitals?** | Yes |
| **53. Main problems in PUBLIC hospitals (multiple answers):** | No problems |
| Low salaries |
| Long shifts |
| Work overload |
| Limited scientific opportunities |
| High-complexity procedures |
| Other |
| **54. Main problems in PRIVATE hospitals (multiple answers):** | No problems |
| Low salaries |
| Long shifts |
| Limited scientific opportunities |
| Low-complexity procedures |
| Insurance companies difficult to access |
| Insufficient staff (nurses, assistants) |
| Other |
| **55. Would you move to another Autonomous Community if better paid?** | Yes |
| **56. Which measures are most effective to encourage vascular surgeons to work in regional hospitals? (first choice):** | Better technology |
| More staff (medical/nursing) |
| Split contracts 50/50 or 60/40 |
| Extra points for working in regional hospitals |
| Links with universities |
| Promote research |
| **57. How should Angiology and Vascular Surgery evolve? (multiple answers):** | More research hours within working day |
| Subspecialization |
| PhD/master’s grants |
| Always on-call from home |
| Two attendings on-call |
| Presence in transplant units |
| High-resolution outpatient clinics |
| Hybrid OR |
| Better salaries |
| Other |
